# Supplementary material for: Differential Association of Uncoupling Protein 2 Polymorphisms with Pattern Identification among Korean Stroke Patients: A Diagnostic System in Traditional Korean Medicine
Source: Hindawi journal article supplement (doi:10.1155/2012/532078), 2012-01-01
Supplement: f1 [file 532078.f1.pdf]

Supplement 1. Differences in the body characteristics and serum lipid parameters among the pattern identification groups of Korean stroke patients

| Characteristics               | QD             | D&P            | YD            | F&H            | p            |
|-------------------------------|----------------|----------------|---------------|----------------|--------------|
| <i>body characteristics</i>   |                |                |               |                |              |
| weight (kg)                   | 57.16 ±9.3*    | 63.62 ±10.46   | 56.84 ±10.07  | 64.42 ±10.33   | <0.001       |
| BMI (kg/m <sup>2</sup> )      | 22.87 ±2.90    | 24.73 ±3.22    | 22.65 ±3.15   | 24.08 ±2.92    | <0.001       |
| waist circumference (cm)      | 85.06 ±8.60    | 89.0 ±9.46     | 83.05 ±9.25   | 88.04 ±8.90    | <0.001       |
| WHR                           | 0.927 ±0.100   | 0.943 ±0.077   | 0.936 ±0.142  | 0.948 ±0.092   | <0.001       |
| <i>serum lipid parameters</i> |                |                |               |                |              |
| total cholesterol (mg/dL)     | 185.29 ±49.18  | 190.06 ±46.82  | 186.27 ±40.65 | 179.46 ±44.930 | 0.149        |
| triglyceride (mg/dL)          | 156.06 ±148.78 | 164.33 ±115.24 | 145.47 ±95.23 | 157.99 ±95.43  | <b>0.032</b> |
| HDL-cholesterol               |                |                |               |                |              |
| (mg/dL)                       | 44.85 ±13.31   | 42.40 ±11.92   | 44.09 ±13.60  | 42.37 ±11.90   | 0.303        |
| Atherogenic index             | 0.478 ±0.298   | 0.527 ±0.287   | 0.472 ±0.304  | 0.525 ±0.277   | 0.056        |

\* indicates mean ± standard deviation

The p values among the PI groups were calculated by a general linear model adjusted for sex, age, smoking and drinking
